# Supplementary material for: Ophthalmologic Manifestations Associated with Fukutin (FKTN) mutation subtypes in Korean Patients with Fukuyama Congenital Muscular Dystrophy: A Single-Center Retrospective Case Series
Source: Research Square preprint supplement (doi:10.21203/rs.3.rs-7124555/v1), 2025-08-01
Supplement: Supplementary file 1 [file 50b5111300f591b37c80896a.docx]

**Supplementary Table 1. Summary of Clinical and Developmental Profiles in 9 Korean FCMD Patients.**

| Case No. | Sex | Chief complaint | Age at diagnosis  mo (yr) | Age at last evaluation  mo (yr) | Best motor ability | Speech | CK at diagnosis  (IU/L) | Muscle  α-DG | Seizure | Preterm birth |
| --- | --- | --- | --- | --- | --- | --- | --- | --- | --- | --- |
| Case 1 | M | Respiratory weakness | 12 (1.00) | 95 (7.92) | Sit without assist | Babble | 14580 | Reduced | - | - |
| Case 2 | M | Feeding difficulty | 9 (0.75) | 76 (6.33) | Sit without assist | Sentences | 7529 | Reduced | - | + |
| Case 3 | F | Hypotonia | 14 (1.17) | 41 (3.42) | Sit without assist | A few words | 3888 | Reduced | - | - |
| Case 4 | M | Hypotonia | 7 (0.58) | 150 (12.50) | Sit with assist | Babble | 6505 | Reduced | + | - |
| Case 5 | M | Feeding difficulty | 9 (0.75) | 202 (16.83) | Sit with assist | A few words | 9208 | Reduced | + | + |
| Case 6 | M | Hypotonia | 3 (0.25) | 46 (3.83) | Sit without assist | A few words | 7800 | Reduced | - | - |
| Case 7 | M | Respiratory weakness | 8 (0.67) | 123 (10.25) | Sit with assist | Babble | 7261 | Reduced | + | - |
| Case 8 | F | Hypotonia | 6 (0.50) | 54 (4.50) | Sit without assist | Many  single words | 5340 | Reduced | + | + |
| Case 9 | F | Hypotonia | 16 (1.33) | 140 (11.67) | Sit without assist | Babble | 3780 | Reduced | + | - |

**α-DG = α-dystroglycan; CK = Creatine Kinase; F = female; FCMD = Fukuyama congenital muscular dystrophy; IU = International Unit; M = male****; mo = month;** **yr = year**
