# Supplementary material for: Ophthalmologic Manifestations Associated with Fukutin (FKTN) mutation subtypes in Korean Patients with Fukuyama Congenital Muscular Dystrophy: A Single-Center Retrospective Case Series
Source: Research Square preprint supplement (doi:10.21203/rs.3.rs-7124555/v1), 2025-08-01
Supplement: Supplementary file 2 [file 531f11b3c543ebf1ebdb2236.docx]

**Supplementary table 2. *FKTN* Variants in this study.**

| Abbreviation | Full Mutation Description | Type of Mutation | Base Change |
| --- | --- | --- | --- |
| RT | Retrotransposon insertion (3-kb SVA retrotransposon in intron 1) | Founder mutation (retrotransposon insertion) |  |
| c.1136G>C | Nucleotide substitution at c.1136: G to C | Missense | G > C |
| c.1170_1171delCGa | Two-nucleotide deletion at c.1170_1171: delCG | Frameshift | CG deletion |
| c.165+835T>G | Deep intronic variant 835 bp downstream of exon 2: T to G | Predicted splice-site disruption | T > G |
| c.647+2084G>T | Deep intronic variant 2084 bp downstream of exon 5: G to T | Predicted splice-site disruption | G > T |
| c.648-1243G>T | Deep intronic variant 1243 bp upstream of exon 6: G to T | Cryptic exon activation / splice defect | G > T |

**a = Novel variant; A = adenine; C = cytosine****; c. = coding DNA sequence; *FKTN* = *Fukutin*; del = deletion; G = guanine; RT = Retrotransposon insertion (a 3-kb SVA retrotransposon in intron 1, which is a founder mutation); T = thymine**
